# Supplementary material for: The role of Themis in development of type 2 diabetes
Source: Research Square preprint supplement (doi:10.21203/rs.3.rs-7943370/v1), 2025-11-07
Supplement: Supplementary file 1 [file 75e18146b9c7a5f6a9b5dd73.pdf]

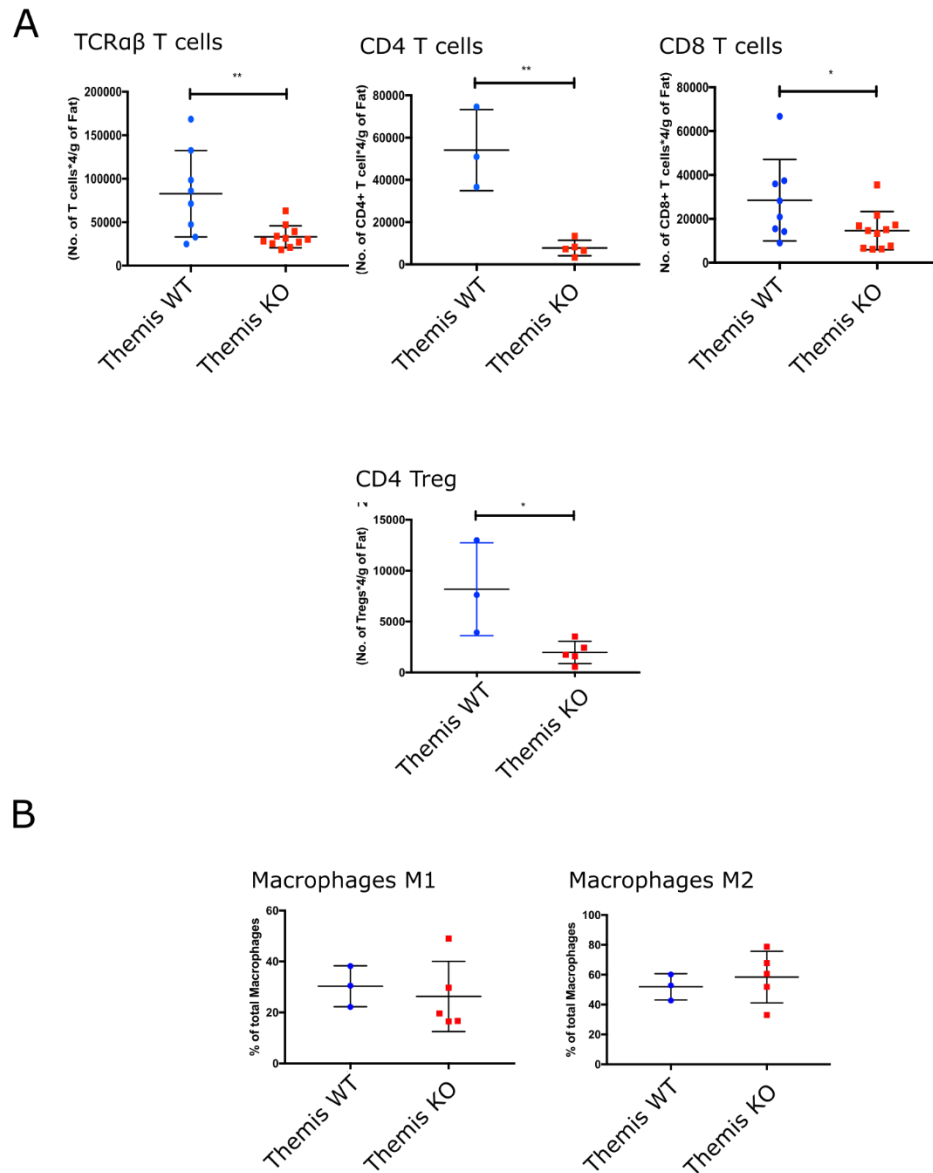

**Supplementary Figure 1. A.** Numbers of T cells calculated per gram of VAT in *Themis* WT and KO mice on HFD. **B.** Proportions of (F) M1 and (G) M2 macrophages in VAT of *Themis* WT and KO mice on HFD.

A

Themis WT TRAV6D-6

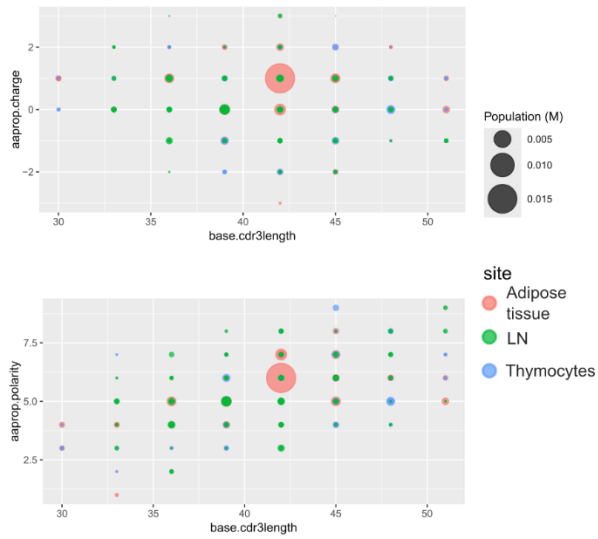

Themis KO TRAV6D-6

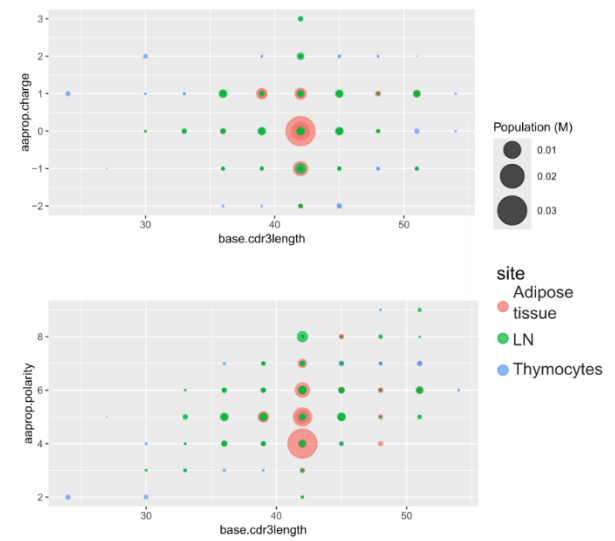

B

Themis WT TRAV12-2

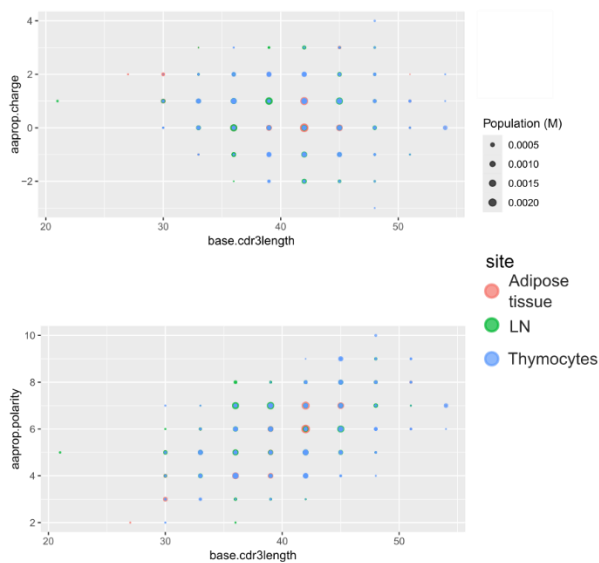

Themis KO TRAV12-2

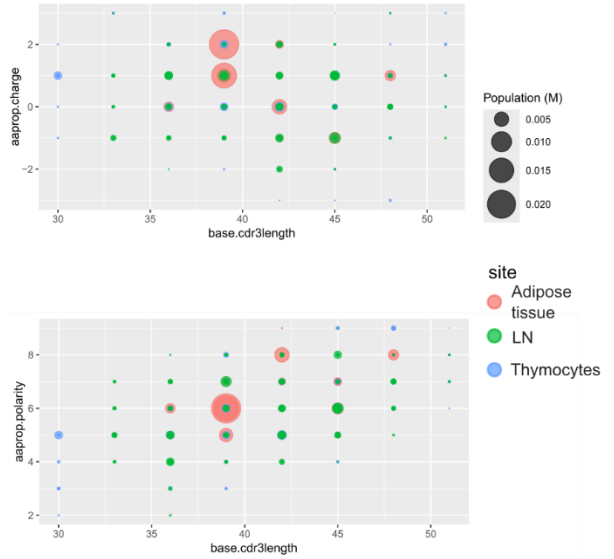

**Supplementary Figure 2. A.** Physical properties (charge and polarity) and CDR3 length of TRAV6D-6 TCRs from adipose tissue, thymocytes, and lymph nodes, comparing *Themis* WT and KO repertoires. **B.** Physical properties (charge and polarity) and CDR3 length of TRAV12-2 TCRs from adipose tissue, thymocytes, and lymph nodes, comparing *Themis* WT and KO repertoires.

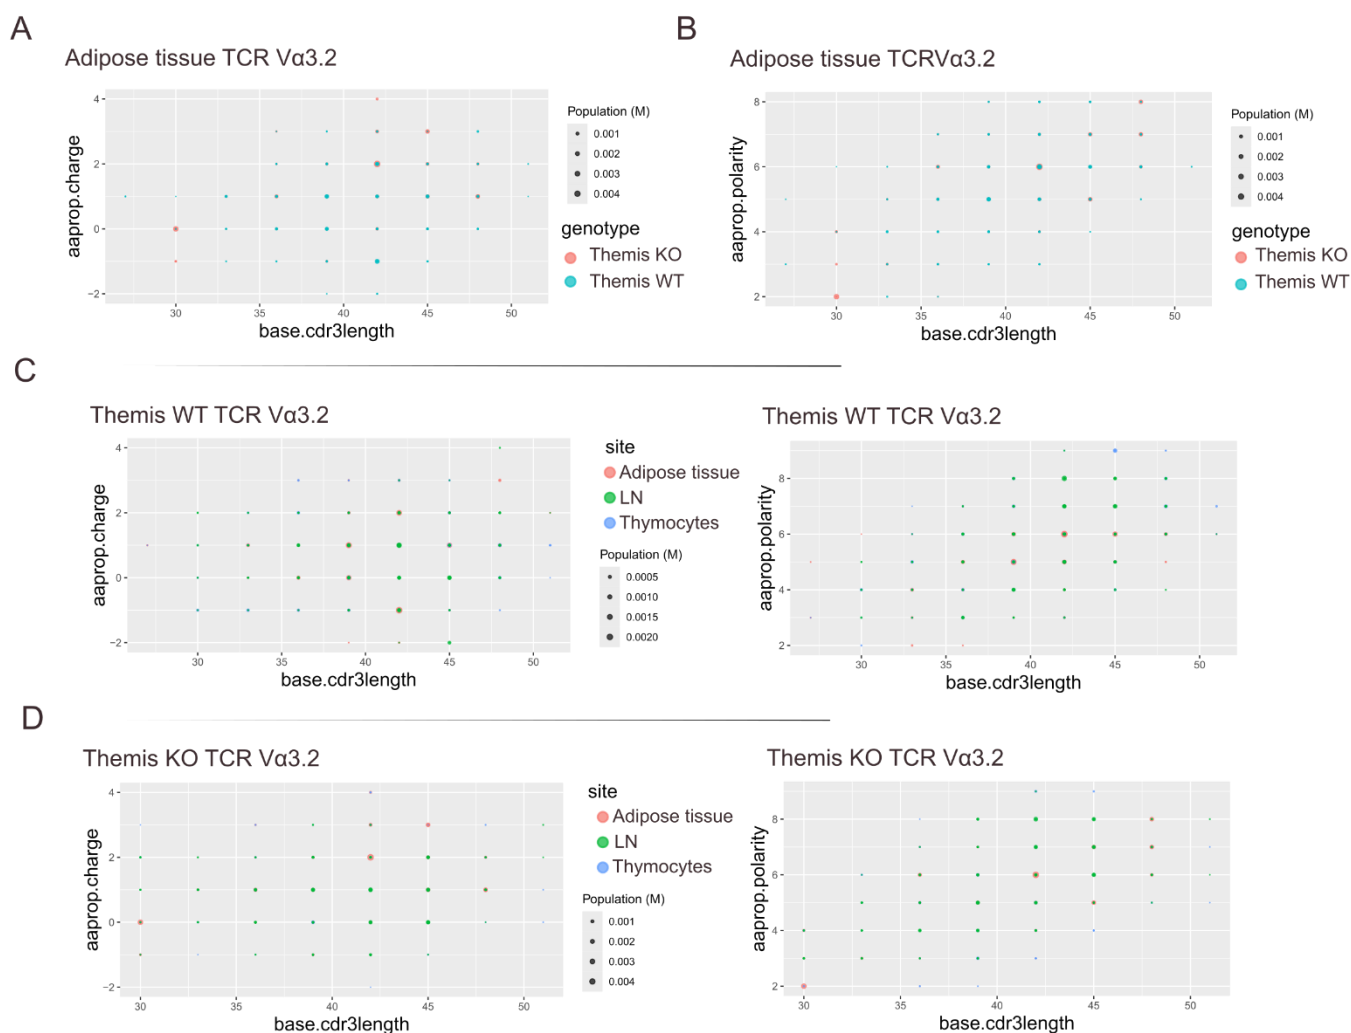

**Supplementary Figure 3. A.** Charge and **B.** polarity together with CDR3 length distribution of TRAV9N-3/Va3.2 TCRs from adipose tissue, illustrating the frequency variation between *Themis* WT and KO genotypes. **C.** Physical properties (hydrophobicity and CDR3 length) of TRAV9N-3/Va3.2 TCRs from adipose tissue, thymocytes, and lymph nodes of *Themis* WT. **D.** Physical properties (hydrophobicity and CDR3 length) of TRAV9N-3/Va3.2 TCRs from adipose tissue, thymocytes, and lymph nodes of *Themis* KO.

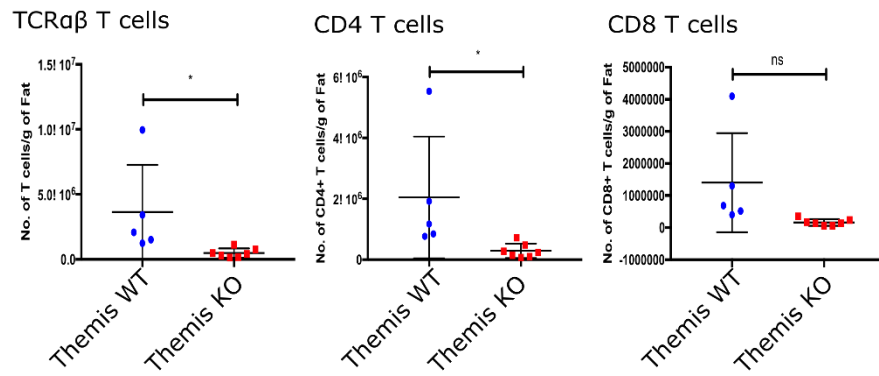

**Supplementary Figure 4.** The total numbers of TCRαβ T cells, CD4 T cells and CD8 T cells per gram of fat in VAT of germ-free mice conventionalized with microbiomes derived from *Themis* WT and KO mice on HFD.

A

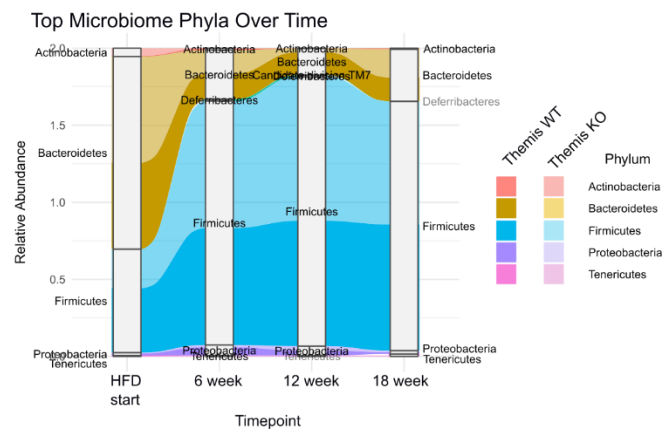

B

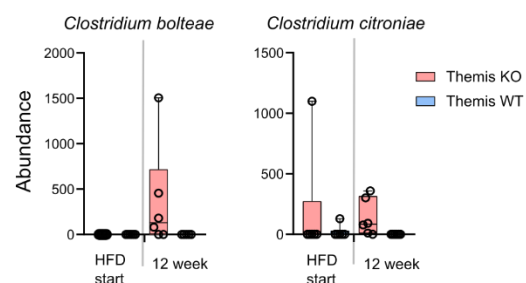

**Supplementary Figure 5. A.** Relative abundance of major microbiome Phyla over time. **B.** Abundance of *Clostridium bolteae* and *Clostridium citroniae* at the base line (HFD start) and after 12 weeks of HFD within microbiomes derived from *Themis* WT and KO models.

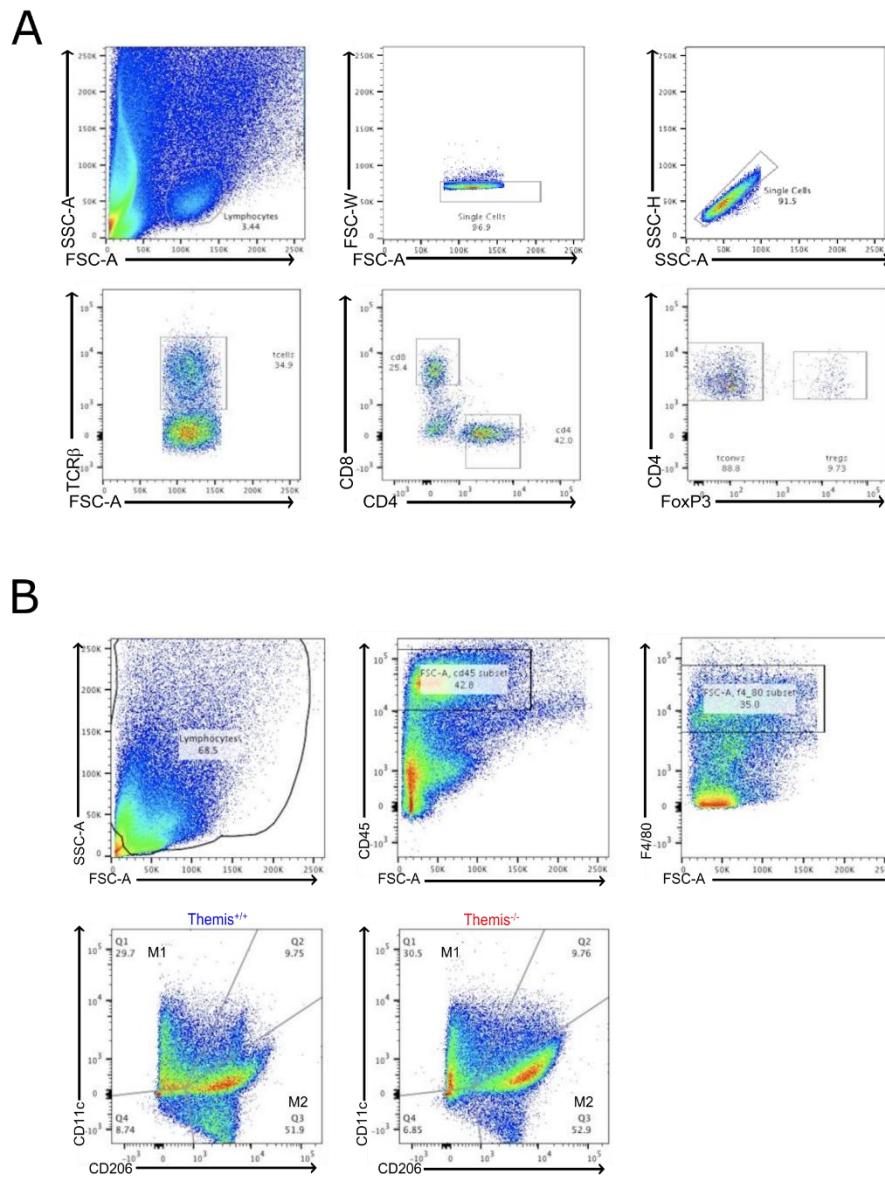

**Supplementary Figure 6.** Gating strategy for analyzing VAT-derived **A.** TCR $\alpha\beta$  T cells and **B.** Macrophages

|                                       |                  | WT     | KO    | p-value |
|---------------------------------------|------------------|--------|-------|---------|
| ORGAN<br>WEIGHT(grams)                | Spleen           | 0.14   | 0.14  | 0.98    |
|                                       | Pancreas         | 0.54   | 0.95  | 0.024   |
|                                       | Liver            | 3.86   | 2.58  | 0.04    |
|                                       | Stomach          | 0.39   | 0.57  | 0.029   |
|                                       | VAT              | 1.23   | 2.48  | 0.0031  |
|                                       | Cecum            | 0.35   | 0.46  | 0.17    |
|                                       | Left Kidney      | 0.25   | 0.25  | 0.89    |
|                                       | Right Kidney     | 0.22   | 0.25  | 0.14    |
|                                       | Brain            | 0.44   | 0.44  | 0.99    |
|                                       | Heart            | 0.17   | 0.18  | 0.30    |
| ORGAN SIZE/AREA<br>(cm <sup>2</sup> ) | Spleen           | 0.65   | 0.57  | 0.55    |
|                                       | Liver            | 9.84   | 8.87  | 0.51    |
|                                       | Stomach          | 0.77   | 1.51  | 0.052   |
|                                       | Small Intestines | 38.20  | 38.86 | 0.73    |
|                                       | Large Intestines | 8.60   | 7.17  | 0.0031  |
|                                       | Left Kidney      | 0.55   | 0.59  | 0.68    |
|                                       | Right Kidney     | 0.50   | 0.55  | 0.50    |
|                                       | Heart            | 0.45   | 0.57  | 0.07    |
| BLOOD<br>BIOCHEMISTRY                 | ALB (g/dL)       | 3.54   | 3.45  | 0.78    |
|                                       | ALP (U/L)        | 121.8  | 82.5  | 0.11    |
|                                       | ALT (U/L)        | 328.4  | 52    | 0.014   |
|                                       | AMY (U/L)        | 1068.2 | 1004  | 0.72    |
|                                       | TBIL (mg/dL)     | 0.3    | 0.3   | 0       |
|                                       | BUN (mg/dL)      | 16.6   | 26    | 0.0041  |
|                                       | CA (mg/dL)       | 10.68  | 10.1  | 0.14    |
|                                       | PHOS (mg/dL)     | 6.24   | 6.4   | 0.73    |
|                                       | CRE (mg/dL)      | 0.22   | 0.35  | 0.20    |
|                                       | Na (mM)          | 167.8  | 169.5 | 0.19    |
|                                       | K (mM)           | 6.8    | 6.5   | 0.50    |
|                                       | TP (g/dL)        | 6.92   | 5.75  | 0.0091  |
|                                       | GLOB (g/dL)      | 3.4    | 2.4   | 0.0008  |

**Supplementary Table 1.** Necropsy and blood biochemistry results from germ free conventionalized with Themis<sup>-/-</sup> and Themis<sup>+/+</sup> microbiome. Statistically significant differences have been highlighted in yellow.
